# Supplementary material for: dGTP Starvation in Escherichia coli Provides New Insights into the Thymineless-Death Phenomenon
Source: PubMed Central journal article supplement (PMC4014421; doi:10.1371/journal.pgen.1004310), 2014-05-08

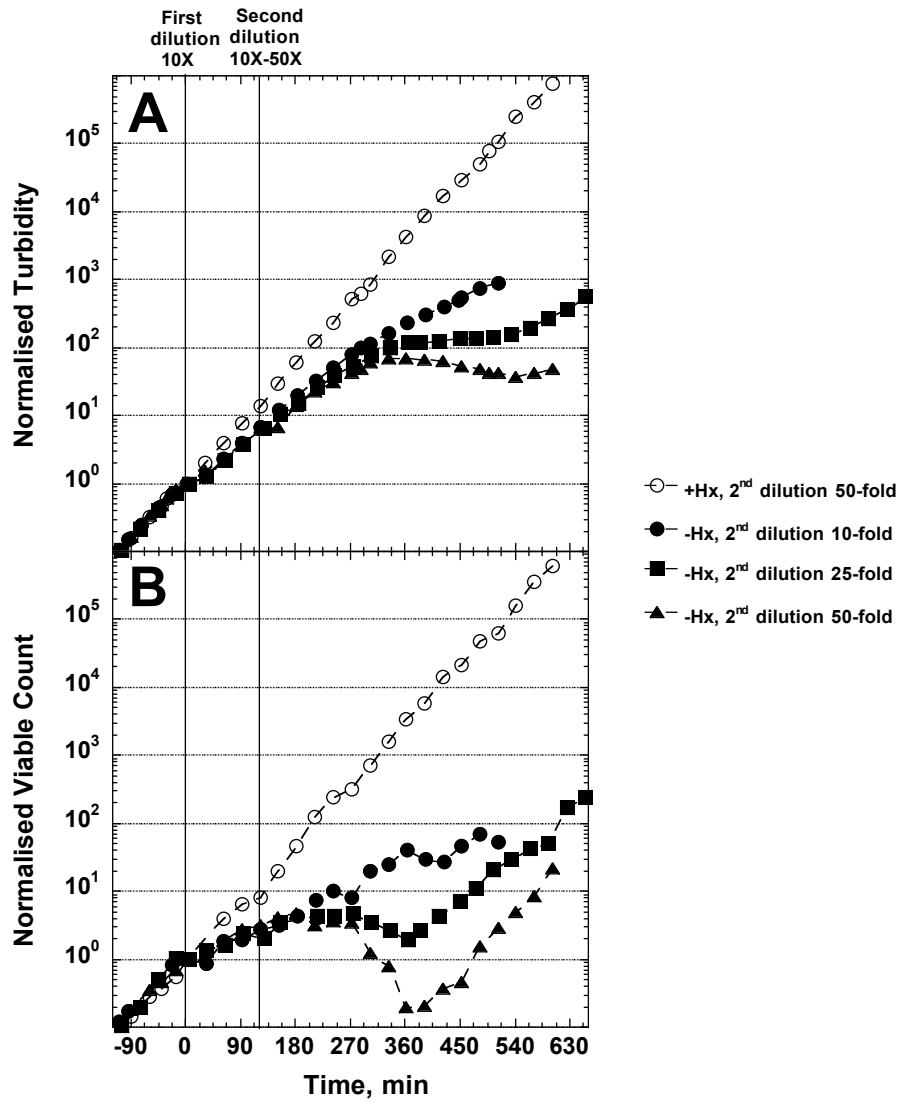

Supplement: pgen.1004310.s001.pdf [file pgen.1004310.s001.pdf]
